# Supplementary material for: N-Halaminated spermidine-containing polymeric coating enables titanium to achieve dual functions of antibacterial and osseointegration
Source: Royal Society of Chemistry journal article supplement (doi:10.1039/d4bm00061g), 2024-01-01
Supplement: d4bm00061g1.pdf [file d4bm00061g1.pdf]

## Supporting Information

### ***N*-Halaminated spermidine-containing polymeric coating enables titanium to achieve dual functions of antibacterial and osseointegration**

*Hang Ren*†, *Peng Wang*†, *Hanwen Huang*†, *Junshen Huang*, *Yuheng Lu*, *Yanfeng Wu*,

*Zhongyu Xie*, *Youchen Tang*\*, *Zhaopeng Cai*\*, *Huiyong Shen*\*

*H. Ren*, *P. Wang*, *H. Huang*, *J. Huang*, *Y. Lu*, *Y. Wu*, *Z. Xie*, *Y. Tang*, *Z. Cai*, *H. Shen*

The Eighth Affiliated Hospital

Sun Yat-sen University

Shenzhen 518033, P.R. China

\*Email:

[tangych7@mail.sysu.edu.cn](mailto:tangych7@mail.sysu.edu.cn), [caizhp3@mail.sysu.edu.cn](mailto:caizhp3@mail.sysu.edu.cn), [shenhuiy@mail.sysu.edu.cn](mailto:shenhuiy@mail.sysu.edu.cn)

†These authors contributed equally to this work.

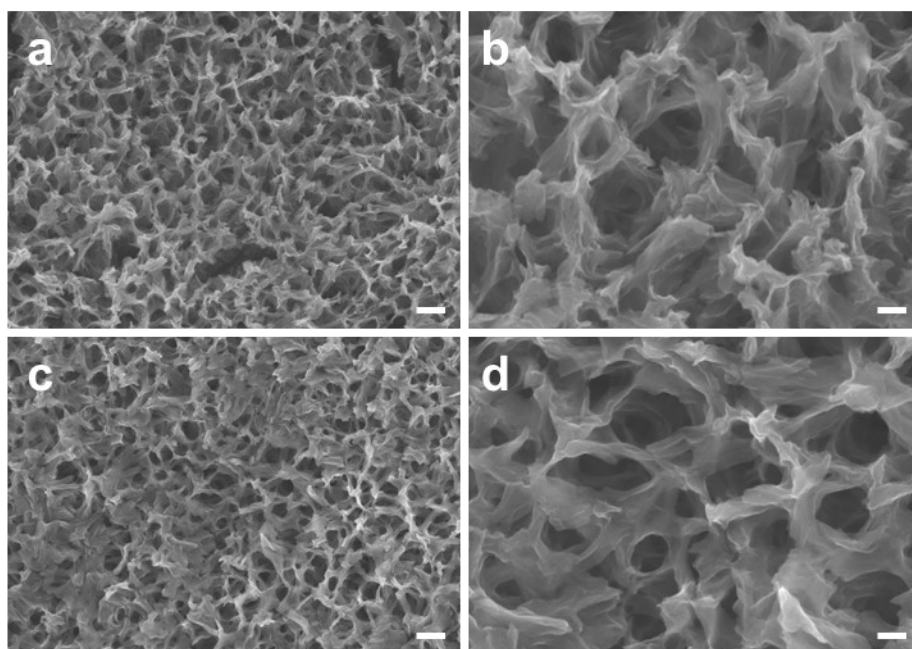

**Fig. S1** SEM images of (a,b) Ti-KH570 and (c,d) Ti-PMAA (left scale bars = 500 nm, right scale bars = 150 nm).

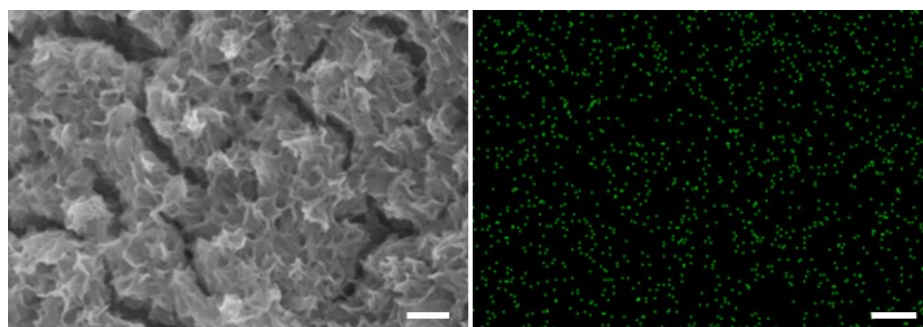

**Fig. S2** SEM and elemental mapping images of Ti-SPD-Cl (scale bars = 250 nm).

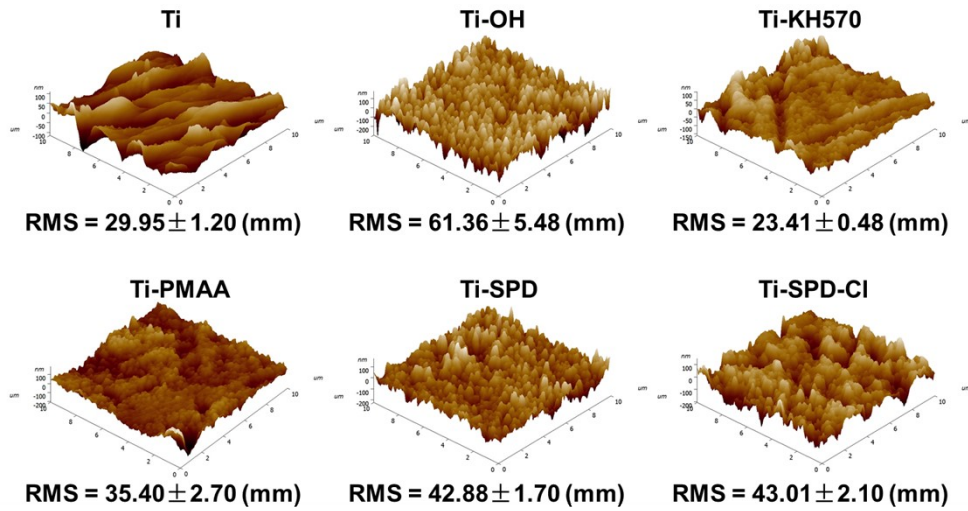

**Fig. S3** Surface morphology and roughness of Ti, Ti-OH, Ti-KH570, Ti-PMAA, Ti-SPD and Ti-SPD-Cl by AFM.

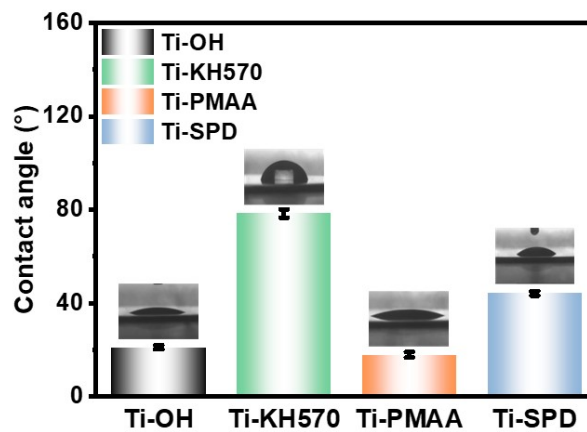

**Fig. S4** Surface water contact angles of Ti-OH, Ti-KH570, Ti-PMAA and Ti-SPD ( $n = 6$ ).

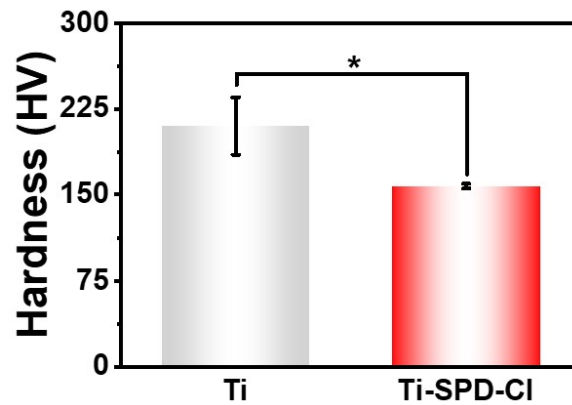

**Fig. S5** Vickers hardness of Ti and Ti-SPD-Cl ( $n = 6$ ,  $*p < 0.05$ ).

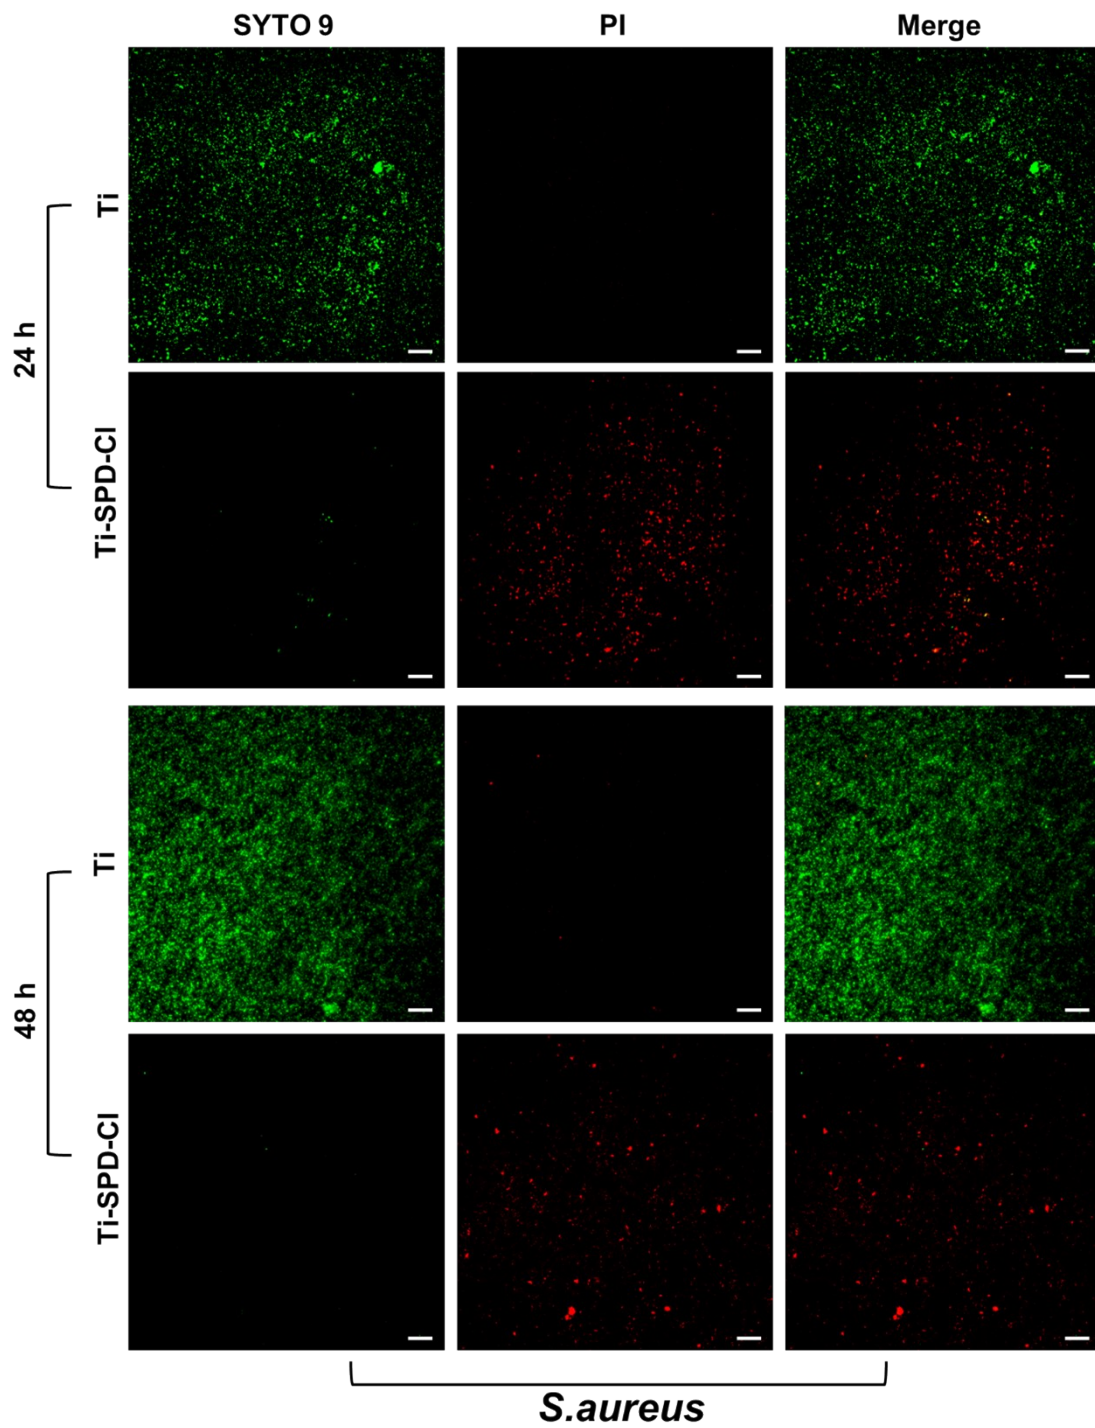

**Fig. S6** The live/dead bacteria distribution of *S. aureus* cultured on the surfaces of Ti and Ti-SPD-CI for 24 and 48 h (green for live bacteria, red for dead bacteria; scale bars = 50  $\mu\text{m}$ ).

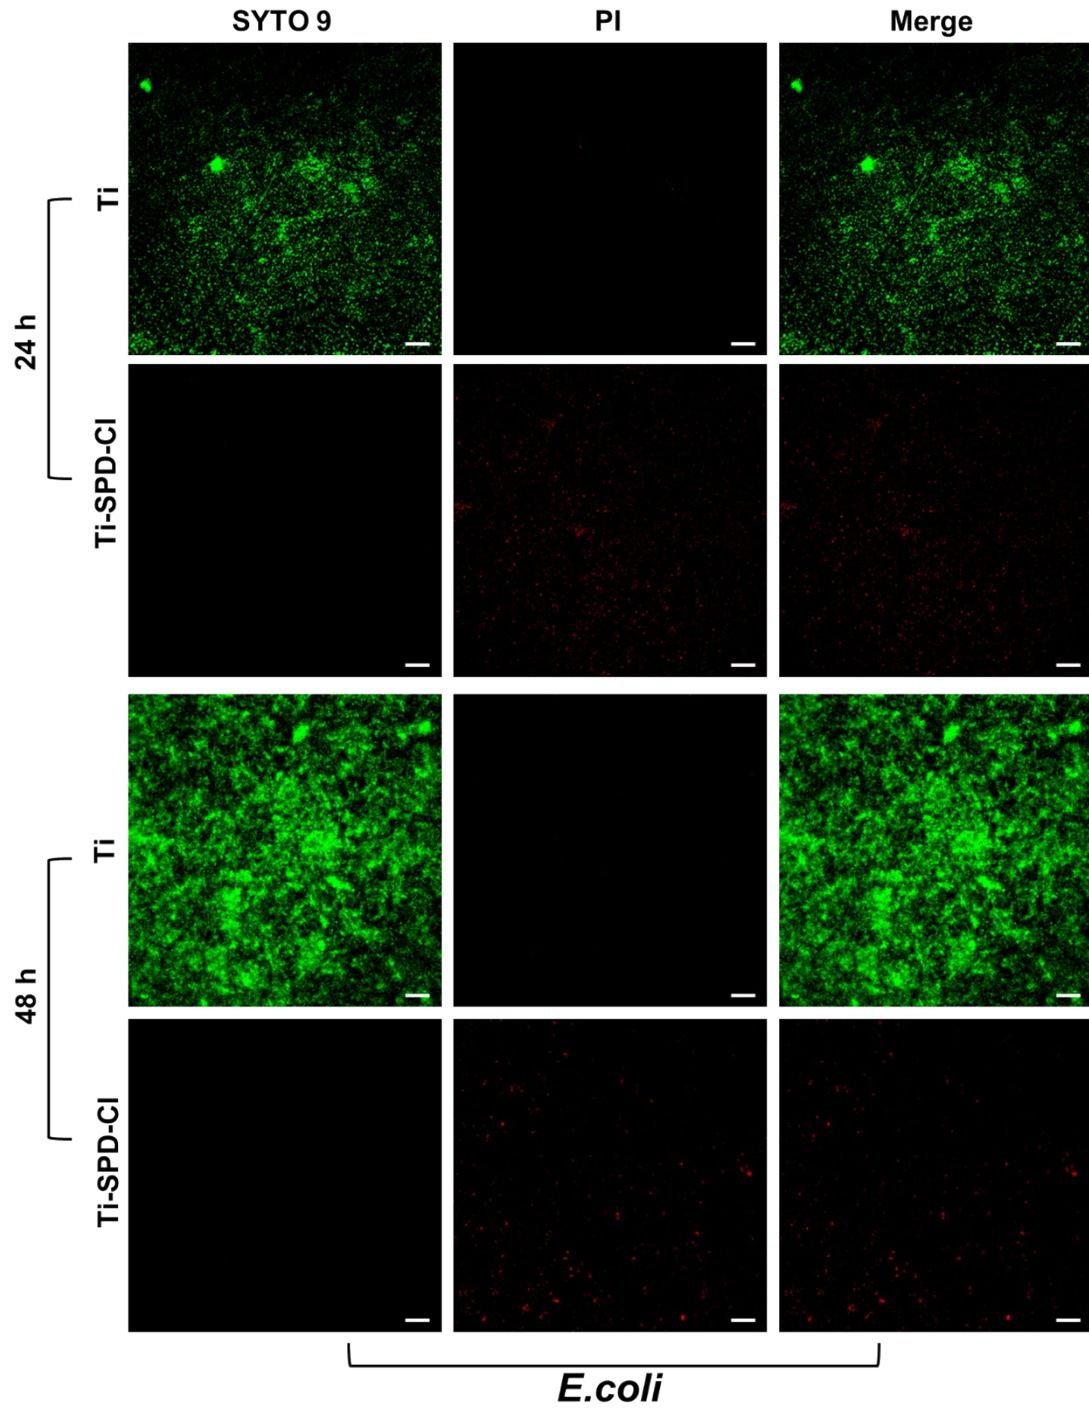

**Fig. S7** The live/dead bacteria distribution of *E. coli* cultured on the surfaces of Ti and Ti-SPD-CI for 24 and 48 h (green for live bacteria, red for dead bacteria; scale bars = 50  $\mu\text{m}$ ).



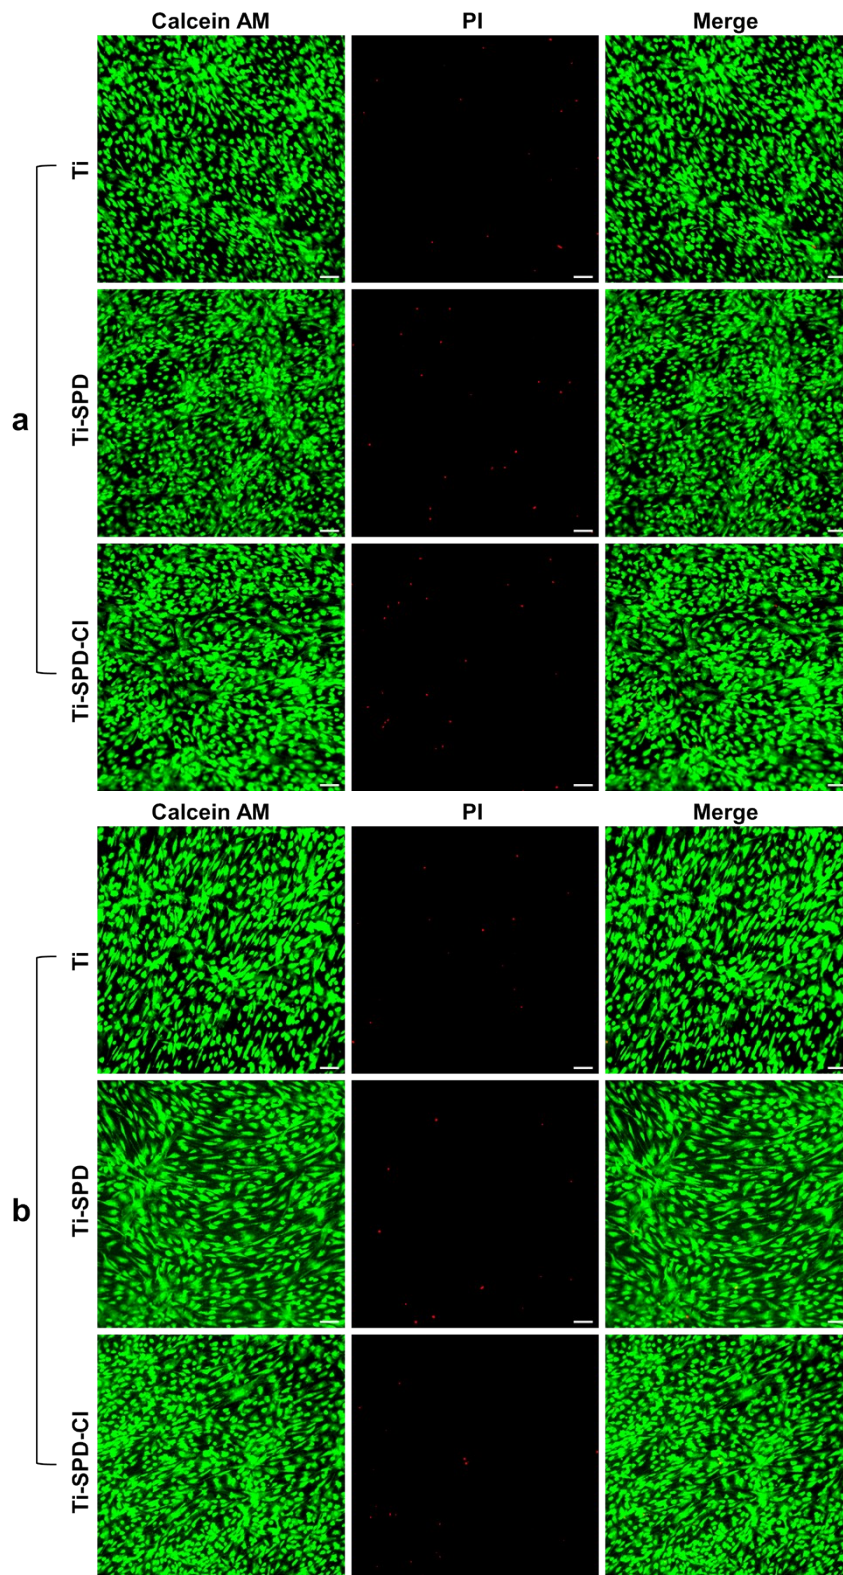

**Fig. S8** Fluorescence images of MSCs cultured on Ti, Ti-SPD and Ti-SPD-CI surfaces for (a) 3 days and (b) 7 days (green for live cells, red for dead cells; scale bars = 200  $\mu\text{m}$ ).

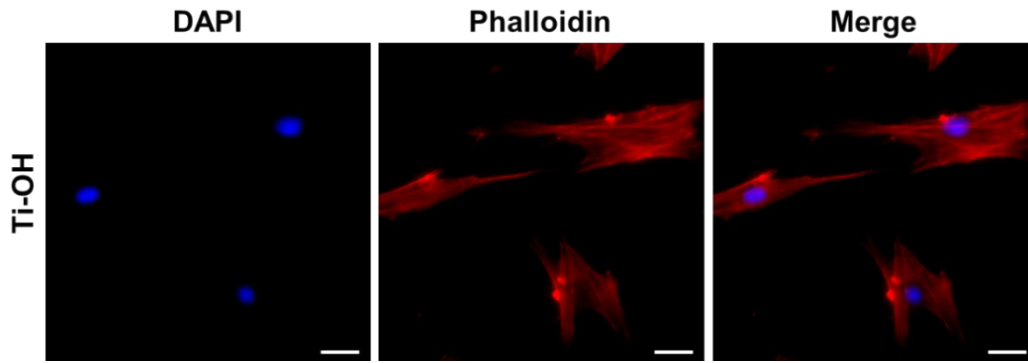

**Fig. S9** Morphology of MSCs cultured on Ti-OH surface for 24 h (red for F-actin, blue for cell nucleus; scale bars = 40  $\mu$ m).

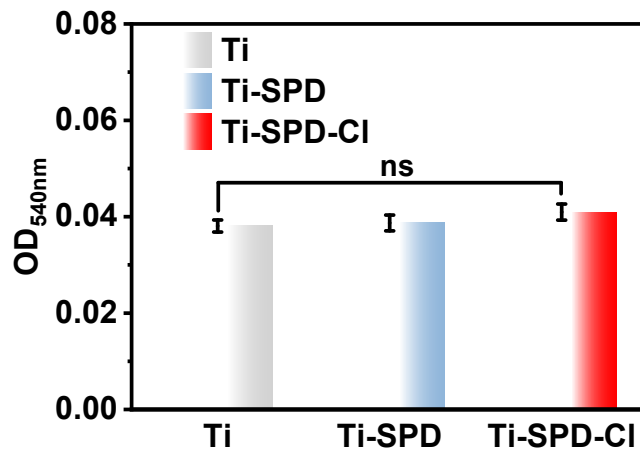

**Fig. S10** OD values of supernatants from Ti, Ti-SPD and Ti-SPD-CI groups after contact with blood ( $n = 3$ , ns means not statistically significant).

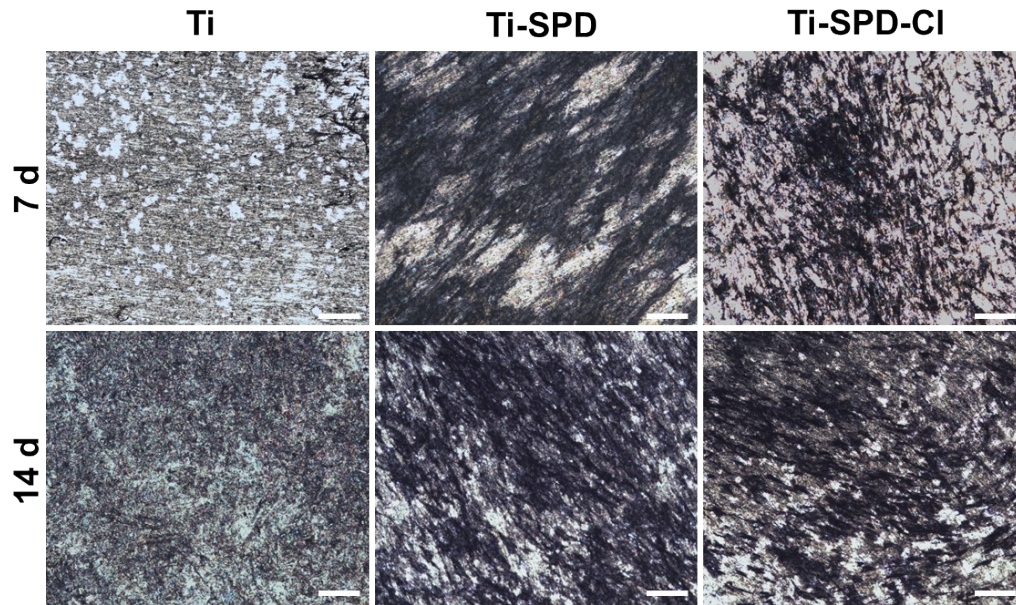

**Fig. S11** ALP staining of MSCs cultured on Ti, Ti-SPD and Ti-SPD-CI surfaces for 7 and 14 days (scale bars = 300  $\mu$ m).

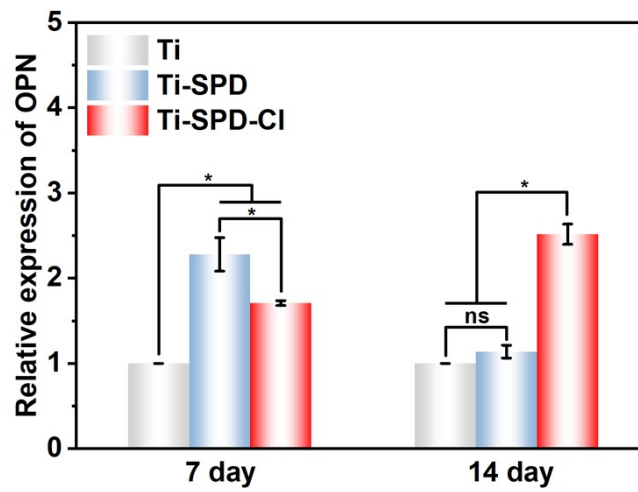

**Fig. S12** OPN gene expression level of MSCs cultured on Ti, Ti-SPD and Ti-SPD-CI surfaces for 7 and 14 days ( $n = 3$ ,  $*p < 0.05$ ).



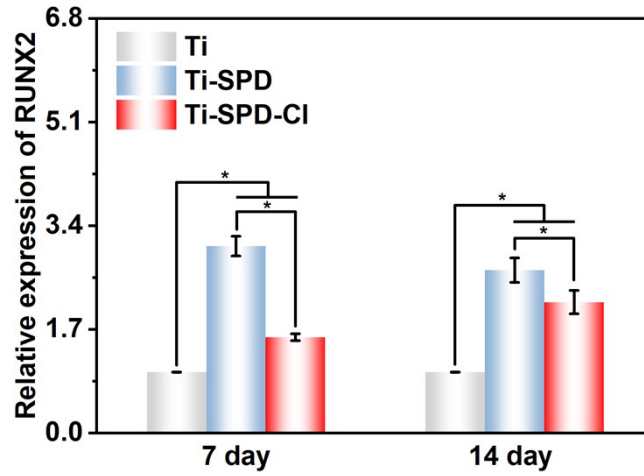

**Fig. S13** RUNX2 gene expression level of MSCs cultured on Ti, Ti-SPD and Ti-SPD-CI surfaces for 7 and 14 days ( $n = 3$ ,  $*p < 0.05$ ).

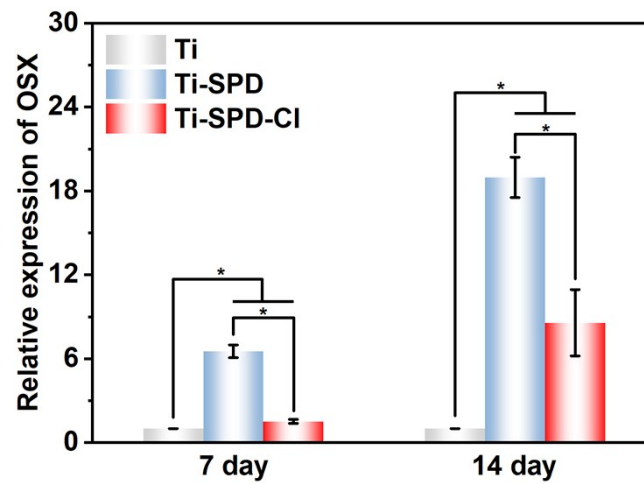

**Fig. S14** OSX gene expression level of MSCs cultured on Ti, Ti-SPD and Ti-SPD-CI surfaces for 7 and 14 days ( $n = 3$ ,  $*p < 0.05$ ).

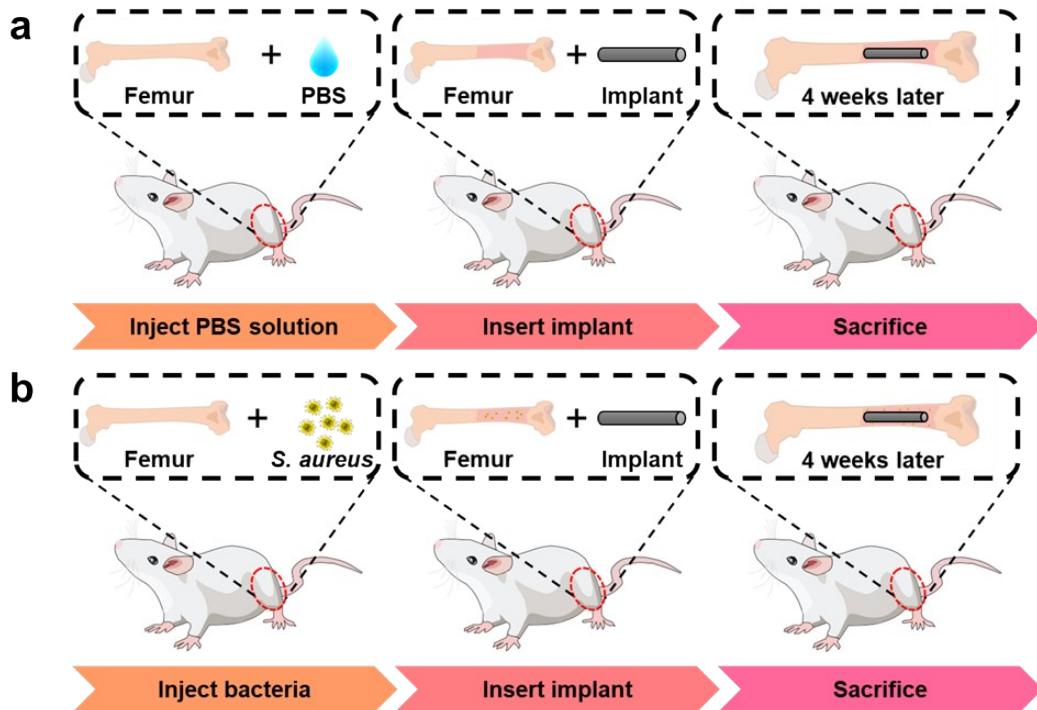

**Fig. S15** Animal surgical procedures for (a) femoral implant model and (b) osteomyelitis implant model.

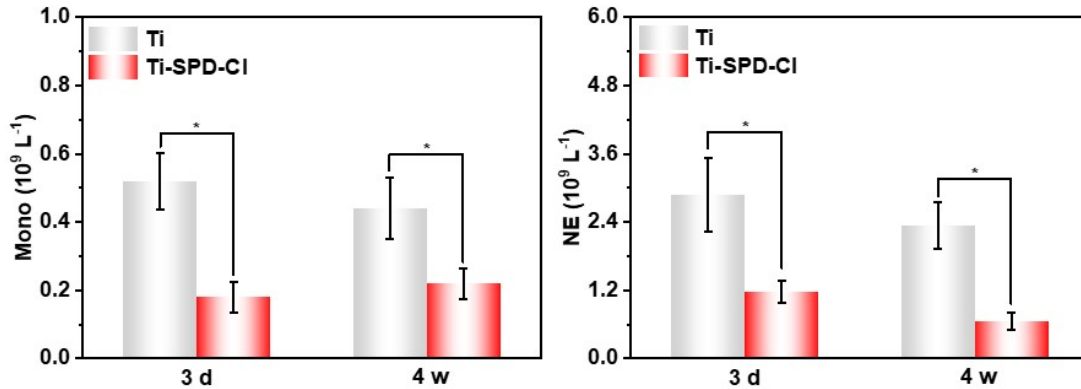

**Fig. S16** Monocyte and neutrophil levels at 3 days and 4 weeks ( $n = 5$ ,  $*p < 0.05$ ).

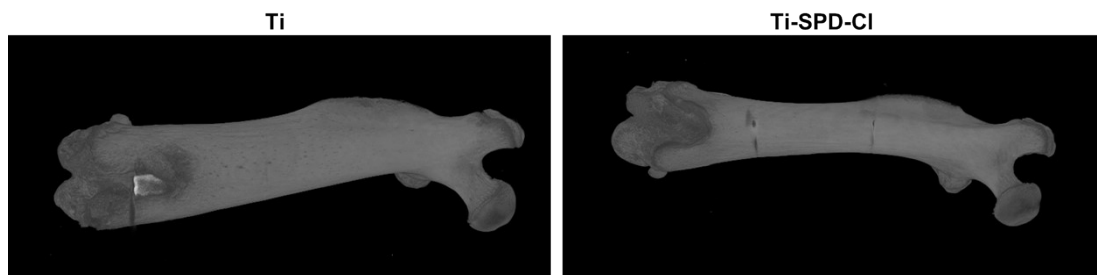

**Fig. S17** Micro-CT images of femur in Ti and Ti-SPD-CI groups.

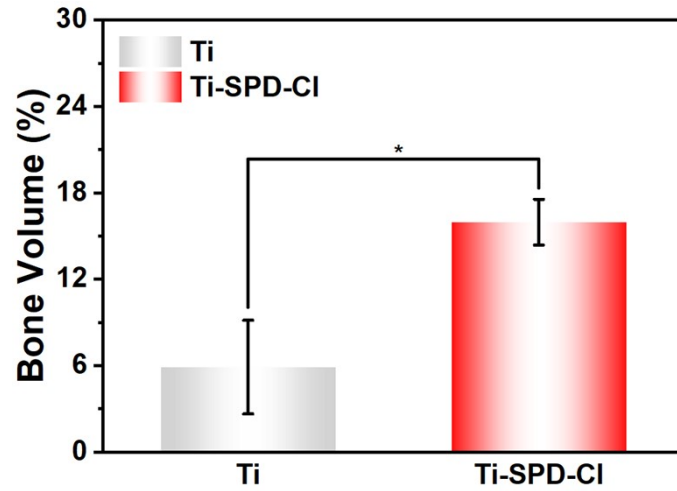

**Fig. S18** Semi-quantitative analysis of Masson staining ( $n = 3$ ,  $*p < 0.05$ ).

**Table S1** Primer sequences used for RT-qPCR.

| Genes | Primers                                 |
|-------|-----------------------------------------|
| OSX   | Forward: 5'-GTGTGCGAATGCAAGGAAGG-3'     |
|       | Reversed: 5'-CCACTCCAAATCCAGGAGGG-3'    |
| OPN   | Forward: 5'-CTCCATTGACTCGAACGACTC-3'    |
|       | Reversed: 5'-CAGGTCTGCGAAACTTCTTAGAT-3' |
| RUNX2 | Forward: 5'-CCGCCTCAGTGATTTAGGGC-3'     |
|       | Reversed: 5'-GGGTCTGTAATCTGACTCTGTCC-3' |
| GAPDH | Forward: 5'-GGAGCGAGATCCCTCCAAAAT-3'    |
|       | Reversed: 5'-GGCTGTTGTCATACTTCTCATGG-3' |
